# Supplementary material for: Interaction between estrogen receptor-α and PNPLA3 p.I148M variant drives fatty liver disease susceptibility in women
Source: PubMed Central journal article supplement (PMC10579099; doi:10.1038/s41591-023-02553-8), 2023-09-25

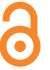

---

# Interaction between estrogen receptor- $\alpha$ and *PNPLA3* p.I148M variant drives fatty liver disease susceptibility in women

---

In the format provided by the authors and unedited

## Supplementary Tables

|                                                               | Sex, F        |                     | PNPLA3, p.I148M alleles |                      | Interaction   |                    |
|---------------------------------------------------------------|---------------|---------------------|-------------------------|----------------------|---------------|--------------------|
|                                                               | Estimate ± SE | p value             | Estimate ± SE           | p value              | Estimate ± SE | p value            |
| <b>Liver Biopsy Cohort (n=1861)</b>                           |               |                     |                         |                      |               |                    |
| Steatosis, grade                                              | -0.230±0.048  | 2*10 <sup>-6</sup>  | +0.640±0.064            | 2*10 <sup>-21</sup>  | +0.325±0.063  | 2*10 <sup>-7</sup> |
| Ballooning, grade                                             | -0.200±0.054  | 0.0002              | +0.252±0.070            | 0.0003               | +0.215±0.070  | 0.002              |
| Lobular inflammation, grade                                   | -0.148±0.049  | 0.0026              | +0.398±0.065            | 2*10 <sup>-9</sup>   | +0.210±0.064  | 0.0011             |
| Fibrosis, stage                                               | -0.226±0.049  | 2*10 <sup>-9</sup>  | +0.433±0.064            | 2*10 <sup>-11</sup>  | +0.147±0.063  | 0.021              |
| NASH, yes                                                     | -0.151±0.052  | 0.0035              | +0.657±0.070            | 9*10 <sup>-21</sup>  | +0.252±0.070  | 3*10 <sup>-4</sup> |
| Clinically significant fibrosis, stage ≥2                     | -0.240±0.067  | 3*10 <sup>-4</sup>  | +0.544±0.087            | 3*10 <sup>-10</sup>  | +0.172±0.084  | 0.045              |
| ALT, log IU/l                                                 | -0.154±0.016  | 1*10 <sup>-21</sup> | +0.192±0.021            | 4*10 <sup>-19</sup>  | +0.036±0.010  | 0.049              |
| AST, log IU/l                                                 | -0.048±0.013  | 2*10 <sup>-4</sup>  | +0.157±0.017            | 8*10 <sup>-20</sup>  | +0.036±0.017  | 0.032              |
| <b>Severe metabolic FLD case-control cohort (n=4374)</b>      |               |                     |                         |                      |               |                    |
| Severe FLD, yes                                               | +0.043±0.068  | 0.53                | +0.855±0.067            | 9*10 <sup>-23</sup>  | +0.184±0.087  | 0.034              |
| <b>Liver-Bible-2022 metabolic dysfunction cohort (n=1142)</b> |               |                     |                         |                      |               |                    |
| ALT, log IU/l                                                 | -0.165±0.015  | 9*10 <sup>-27</sup> | +0.097±0.024            | 4*10 <sup>-5</sup>   | +0.051±0.024  | 0.031              |
| <b>UK Biobank cohort (n=347,127; 35,521 with MRI-PDFF)</b>    |               |                     |                         |                      |               |                    |
| PDFF, RINT, %*                                                | -0.470±0.011  | <10 <sup>-307</sup> | 0.2±0.011               | 2*10 <sup>-49</sup>  | 0.037±0.015   | 0.016              |
| ALT, RINT IU/l*                                               | -0.637±0.004  | <10 <sup>-307</sup> | 0.1±0.004               | 1*10 <sup>-147</sup> | 0.004±0.005   | 0.451              |

**Supplementary Table 1.** Interaction between the *PNPLA3* p.I148M variant and female sex in the pathogenesis of FLD-related liver damage. Upper panel: Impact on histological outcomes and liver enzymes in 1861 individuals at risk in the cross-sectional LBC. NASH: nonalcoholic steatohepatitis. Analyses were performed using multiple generalized linear models adjusted for age, BMI, first 10 principal components of ancestry, and genotyping array. Middle upper panel: Impact on the risk of severe FLD (advanced fibrosis or hepatocellular carcinoma) in 4374 individuals from the severe FLD case-control cohort; the logistic regression model was adjusted for age. Middle lower panel: Impact on ALT levels in 1142 individuals with metabolic dysfunction in the Liver-Bible-2022 cohort; adjusted for ethnicity, age, BMI and T2D. Lower panel: impact on hepatic fat content and ALT levels in 347,127 individuals in the UKBB Biobank population-based cohort. MRI-PDFF: Magnetic resonance imaging proton density fat fraction. RINT: rank-based inverse normal transformation. Analyses were performed using multiple generalized linear models.

|                                                | N= Men/Women  | Sex, F        |                     | PNPLA3, p.1148M alleles |                     | Interaction   |         |
|------------------------------------------------|---------------|---------------|---------------------|-------------------------|---------------------|---------------|---------|
|                                                |               | Estimate ± SE | p value             | Estimate ± SE           | p value             | Estimate ± SE | p value |
| <b>Liver Biopsy Cohort, Steatosis grade</b>    |               |               |                     |                         |                     |               |         |
| Fertile, <45 years                             | 474/379       | -0.192±0.035  | 6*10 <sup>-8</sup>  | +0.271±0.046            | 5*10 <sup>-9</sup>  | +0.104±0.046  | 0.023   |
| Transition, 45-55 years                        | 210/273       | -0.060±0.047  | 0.176               | +0.385±0.063            | 3*10 <sup>-9</sup>  | +0.123±0.062  | 0.049   |
| Menopause, ≥55 years                           | 257/268       | -0.042±0.043  | 0.335               | +0.251±0.065            | 1*10 <sup>-5</sup>  | +0.214±0.057  | 0.0002  |
| <b>Liver-Bible-2022 Cohort, ALT (log IU/l)</b> |               |               |                     |                         |                     |               |         |
| Age <55 years                                  | 495/103       | -0.147±0.021  | 4*10 <sup>-12</sup> | +0.076±0.032            | 0.017               | +0.039±0.032  | 0.22    |
| Menopause, 55-65 years                         | 456/88        | -0.182±0.022  | 1*10 <sup>-15</sup> | +0.123±0.034            | 0.0004              | +0.068±0.034  | 0.047   |
| <b>UK Biobank Cohort, (MRI-PDFF RINT %)</b>    |               |               |                     |                         |                     |               |         |
| Transition, 45-55 years                        | 1996/2446     | -0.537±0.030  | 5*10 <sup>-67</sup> | +0.163±0.031            | 2*10 <sup>-7</sup>  | 0.007±0.042   | 0.86    |
| Menopause, ≥55 years                           | 15363/15716   | -0.463±0.012  | <10 <sup>-307</sup> | +0.163±0.012            | 7*10 <sup>-44</sup> | 0.042±0.017   | 0.011   |
| <b>UK Biobank Cohort, ALT (RINT IU/l)</b>      |               |               |                     |                         |                     |               |         |
| Fertile, <45 years                             | 15469/17695   | -0.977±0.011  | <10 <sup>-307</sup> | +0.091±0.01             | 10 <sup>-16</sup>   | -0.055±0.015  | 0.0002  |
| Transition, 45-55 years                        | 42537/53432   | -0.820±0.007  | <10 <sup>-307</sup> | +0.095±0.007            | 4*10 <sup>-41</sup> | -0.015±0.009  | 0.10    |
| Menopause, ≥55 years                           | 102496/115498 | -0.490±0.005  | <10 <sup>-307</sup> | +0.10±0.005             | 5*10 <sup>-96</sup> | 0.025±0.007   | 0.0002  |

**Supplementary Table 2.** Interaction between the *PNPLA3* p.1148M variant and female sex in determining fatty liver. Upper panel: impact on steatosis grade in 1861 individuals at risk in the cross-sectional LBC stratified by age class. Analyses were performed at multivariate generalized linear models, adjusted for age, BMI, type 2 diabetes and study sub-cohort; Middle panels: impact on ALT levels (log IU/l) in 817 individuals aged 40-65 with metabolic risk factors for NAFLD in the overall Liver-Bible-2021 cohort. Analyses were performed at multivariate generalized linear models adjusted for ethnicity, age, BMI, type 2 diabetes. The *TM6SF2* p.E167K variant was not significantly associated with ALT in this cohort. Lower panel: UK Biobank cohort, hepatic fat content (n=35,521), MRI-PDFF: Magnetic resonance imaging proton density fat fraction. Analyses were performed using multiple generalized linear models.

|                                       | <i>TM6SF2</i> , p.E167K alleles |         | <i>MBOAT7</i> , r641738 T alleles |         |
|---------------------------------------|---------------------------------|---------|-----------------------------------|---------|
|                                       | Estimate ± SE                   | p value | Estimate ± SE                     | p value |
| <b>Liver Biopsy Cohort</b>            |                                 |         |                                   |         |
| Steatosis, grade                      | -0.078±0.114                    | 0.49    | -0.113±0.062                      | 0.071   |
| Ballooning, grade                     | -0.075±0.122                    | 0.54    | +0.068±0.071                      | 0.33    |
| Lobular inflammation, grade           | -0.030±0.116                    | 0.79    | +0.004±0.064                      | 0.94    |
| Fibrosis, stage                       | -0.104±0.114                    | 0.36    | +0.021±0.064                      | 0.75    |
| NASH, yes                             | -0.030±0.131                    | 0.81    | +0.016±0.075                      | 0.83    |
| Clinically significant fibrosis, yes  | -0.160±0.146                    | 0.27    | -0.060±0.088                      | 0.49    |
| ALT, log IU/l                         | -0.012±0.043                    | 0.78    | +0.001±0.022                      | 0.99    |
| AST, log IU/l                         | -0.048±0.035                    | 0.17    | -0.011±0.018                      | 0.55    |
| <b>Severe FLD case-control Cohort</b> |                                 |         |                                   |         |
| Severe FLD, yes                       | +0.047±0.163                    | 0.77    | +0.093±0.085                      | 0.27    |

**Supplementary Table 3.** Interaction between the *TM6SF2* p.E167K and *MBOAT7* rs641738 variants and female sex in the pathogenesis of FLD-related liver damage. Upper panel: in 1861 individuals at risk in the cross-sectional LBC. NASH: nonalcoholic steatohepatitis. Analyses were performed at multivariate generalized linear models adjusted for age, BMI, type 2 diabetes, study sub-cohort, the genetic variant under evaluation and sex. Bottom: in 4374 individuals from the severe metabolic FLD case-control cohort (adjusted for age, the genetic variant under evaluation and sex). The interaction term (genetic variant \* sex) is reported in the table. In this cohort, both rs58542926 *TM6SF2* ( $p=0.0008$ ) and rs641738 *MBOAT7* ( $p=0.0007$ ) were associated with severe FLD; rs72613567 *HSD17B13* was also associated with protection against FLD ( $p<0.0001$ ), but there was no significant interaction with sex as well. Analyses were performed at multivariate generalized linear models adjusted for ethnicity, age, BMI, type 2 diabetes.

|                                | PNPLA3 mRNA    |         |
|--------------------------------|----------------|---------|
|                                | Estimate ± SE  | p value |
| <b>Age, years</b>              | -0.005 ± 0.004 | 0.22    |
| <b>Sex, F</b>                  | +0.171 ± 0.062 | 0.007   |
| <b>BMI, Kg/m<sup>2</sup></b>   | +0.011 ± 0.006 | 0.066   |
| <b>T2D, yes</b>                | +0.044 ± 0.070 | 0.53    |
| <b>ALT, IU/l</b>               | +0.001 ± 0.001 | 0.53    |
| <b>PNPLA3 p.I148M, alleles</b> | +0.226 ± 0.072 | 0.002   |

**Supplementary Table 4.** Independent determinants of hepatic *PNPLA3* mRNA levels at unadjusted multivariate generalized linear model in 125 patients with obesity included in the Transcriptomic cohort. SE: standard error, BMI: body mass index, T2D: type 2 diabetes, ALT: alanine aminotransferases.

| Name                           | Forward Sequence                                                            | Reverse Sequence                                                                      | Application                                                            |
|--------------------------------|-----------------------------------------------------------------------------|---------------------------------------------------------------------------------------|------------------------------------------------------------------------|
| <b>PNPLA3</b>                  | TCTACAGTGGCCTTATCCCT                                                        | GAAAGTTCGTGGACTTGACT                                                                  | qRT-PCR                                                                |
| <b>ACTIN</b>                   | GGCATCCTCACCTGAAGTA                                                         | GGGGTGTGAAGGTCTCAA                                                                    | qRT-PCR                                                                |
| <b>FAR1</b>                    | TCTCTTTATTGCGGCAGGGA                                                        | TGGTACTCAACTTCACCCCA                                                                  | qRT-PCR                                                                |
| <b>SPTLC2</b>                  | TCACCTCCTGTAGTGGAGCA                                                        | GGCAGGCATGTAGTGGAGCA                                                                  | qRT-PCR                                                                |
| <b>Human PNPLA3 E1</b>         | CAGGTTGGCAGAGAAGCTGA                                                        | GTGCTCGAACTCCAGTGTCT                                                                  | ChIP PCR                                                               |
| <b>Human PNPLA3 E2</b>         | GCAACAACGCAGAGAGTAGAC                                                       | TCCTGGAGAGAAAACGGCTTC                                                                 | ChIP PCR                                                               |
| <b>Human PNPLA3 E3</b>         | GCGTCCTCTCCGGTATCC                                                          | GAGAGTCCCAGGCTTCGG                                                                    | ChIP PCR                                                               |
| <b>PNPLA3-EDIT-ERE-guide1</b>  | CCGGCCTCTTCTCCCTACACCACT                                                    | AAACAGTGGTGTAGGGAGAAGAGG                                                              | CRISPR/Cas9                                                            |
| <b>PNPLA3-EDIT-ERE-guide2</b>  | CCGGGAGGTCAGGCTGACTGTC                                                      | AAACGACAGTGTGAGCCTGACCTC                                                              | CRISPR/Cas9                                                            |
| <b>PNPLA3 ESR1 Bis 1st PCR</b> | GTAATTGGGTGAGGGATGTTAGTT                                                    | CCACCATAAATCACAAAAATTAATAA<br>TAC                                                     | Methylation<br>(outer)                                                 |
| <b>PNPLA3 ESR1 Bis 2nd PCR</b> | <i>TCGTCGGCAGCGTCAGATGTGTATA<br/>AGAGACAG<br/>AGGGAGAAGAGGTTAGGTTGATATT</i> | <i>GTCTCGTGGGCTCGGAGATGTGTAT<br/>AAGAGACAG<br/>CCACCATAAATCACAAAAATTAATAA<br/>TAC</i> | Methylation<br>(inner)<br><br><i>Partial<br/>Illumina<br/>adapters</i> |

**Supplementary Table 5.** Representative sequence for primers designed to apply in RT-qPCR, ChIP assay and genome editing. List of primers and their sequences used for gene editing. All primers are shown from 5'to3'.

| Antigen            | Supplier                 | Catalog no. | RRID        | Dilution |       |
|--------------------|--------------------------|-------------|-------------|----------|-------|
|                    |                          |             |             | WB       | IF    |
| PNPLA3             | Abcam                    | ab81874     | AB_10712485 | 1:1000   |       |
| PLIN2              | Abcam                    | ab52356     | AB_2223599  | 1:1000   |       |
| GAPDH              | Santa Cruz Biotechnology | Sc-47724    | AB_627678   | 1:1000   |       |
| COL1A1             | Sigma-Aldrich            | HPA011795   | AB_1847088  |          | 1:100 |
| ER $\alpha$ (D8H8) | Cell Signaling           | 8644        | AB_2617128  | 1:1000   |       |

**Supplementary Table 6.** Table of primary antibodies used for western blot and immunofluorescence analysis.

## Supplementary Figures

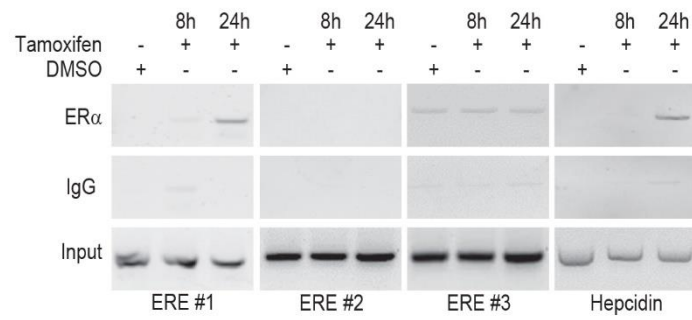

**Supplementary Figure 1. Experimental setup of chromatin immunoprecipitation (ChIP) analysis in HepG2 cells.** HepG2 cells were treated with tamoxifen (10 $\mu$ M) or DMSO as negative control. The binding of ER $\alpha$  at the ERE1, ERE2 and ERE3 of the PNPLA3 gene or Hepcidin as positive control were tested by PCR and resolved on 2% agarose gel. B) Uncropped version of blots.



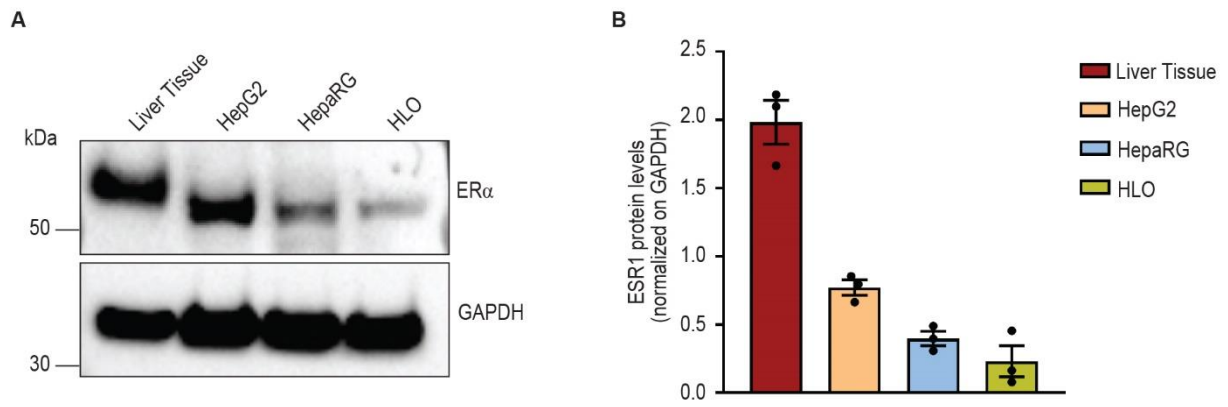

**Supplementary Figure 2. Protein levels of estrogen receptor alpha (ESR1) in HepG2, HepaRG and human liver organoids (HLO) compared to human liver tissue. A)** Western blot analysis of ESR1 protein levels in human liver tissue, HepG2, HepaRG and HLO (GAPDH used as loading control was run on a different gel) and **B)** relative quantification. Data in panels B are presented as mean  $\pm$  SEM (n=3 independent experiments).

## Supplementary Data

Supplementary Figure 2A

IB: ESR1

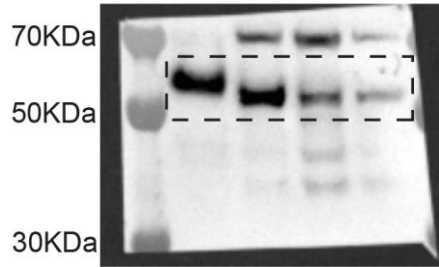

IB: GAPDH

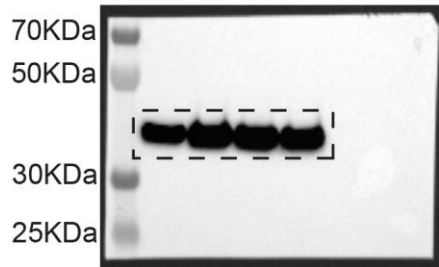

Supplement: 41591_2023_2553_MOESM1_ESM.pdf [file 41591_2023_2553_MOESM1_ESM.pdf]
